# Supplementary material
Source: PubMed Central journal article supplement (PMC5322251)
Supplement: NIHMS801389-supplement-Supp_Fig_S1.pdf [file NIHMS801389-supplement-Supp_Fig_S1.pdf]

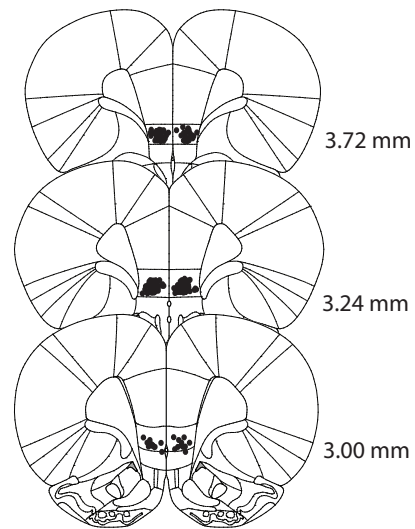

**Figure S1.**

Termination of injector tracks for microinjections into the IL. PL injectors terminated 2 mm dorsal to the IL terminations. Figures adapted from Paxinos and Watson (2007). A/P coordinates (in mm) are relative to Bregma.
