# Supplementary material
Source: PubMed Central journal article supplement (PMC5322251)
Supplement: NIHMS801389-supplement-Supp_Fig_S2.pdf [file NIHMS801389-supplement-Supp_Fig_S2.pdf]

## Inactivation during the Immediate-Delayed task

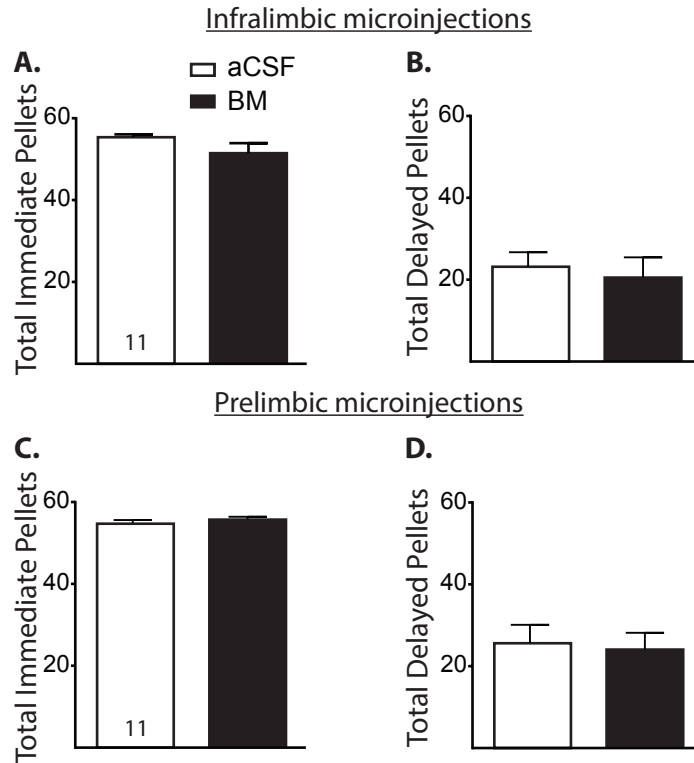

**Figure S2.**

Effects of IL and PL inactivation on number of pellets received during the Immediate vs. Delayed Food Reward task. **A-B**, IL Inactivation with BM had no effect on the total number of immediate or delayed pellets earned during the task (number of pellets shown as mean  $\pm$  SEM). **C-D**, PL inactivation with BM had no effect on the total number of immediate or delayed rewards earned.
